# Supplementary material for: YWHAZ and TBP are potential reference gene candidates for qPCR analysis of response to radiation therapy in colorectal cancer
Source: Springer Nature journal article supplement (doi:10.1038/s41598-023-39488-6), 2023-08-09
Supplement: MOESM1 [file 41598_2023_39488_MOESM1_ESM.pdf]

## Supplementary Information

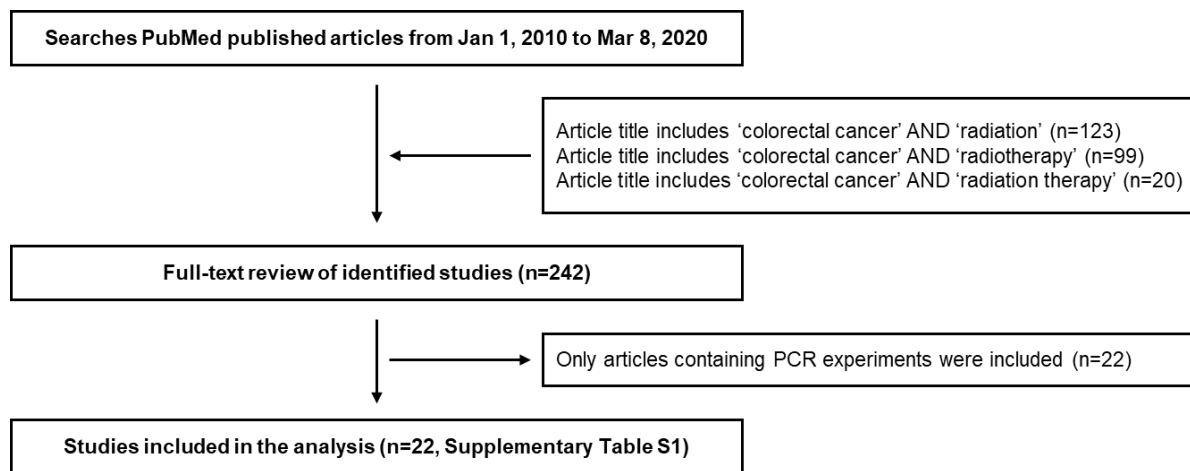

**Supplementary Figure S1.** Flow chart of literature search.

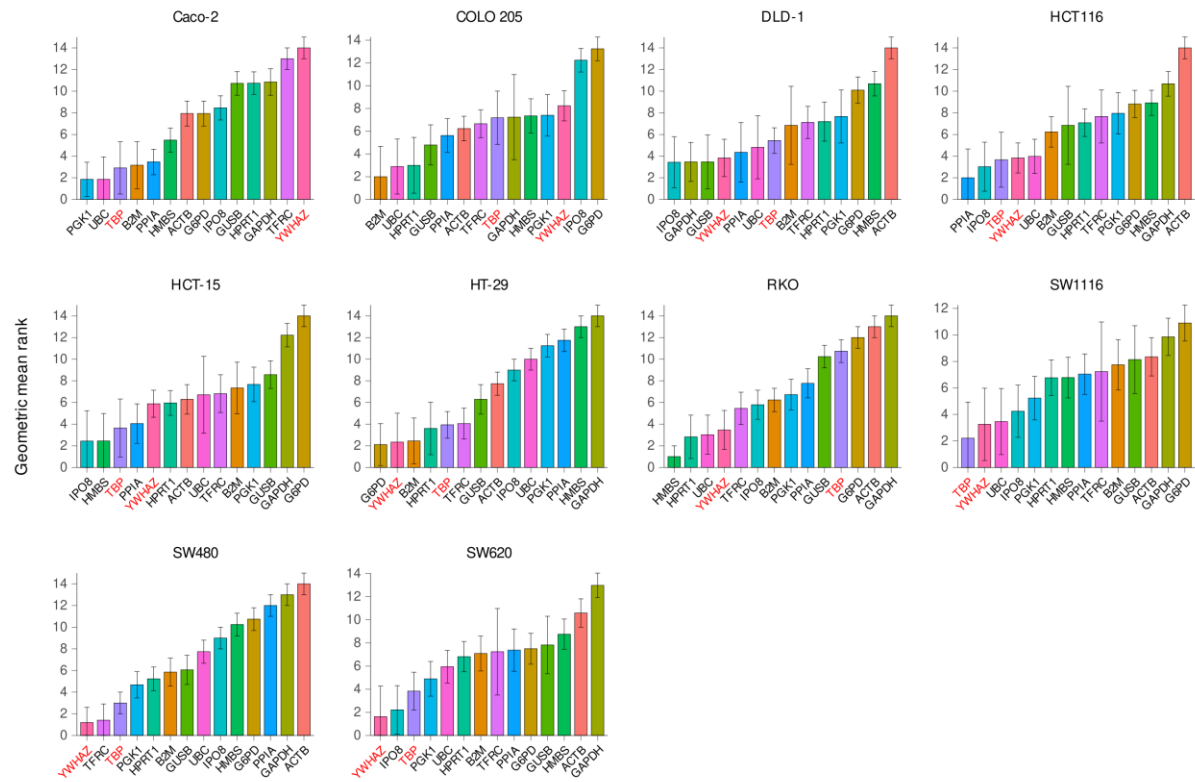

**Supplementary Figure S2.** Gene expression stabilities in ten CRC cell lines exposed to 2 Gy radiation. Colors represent specific genes, and error bars represent standard deviations.



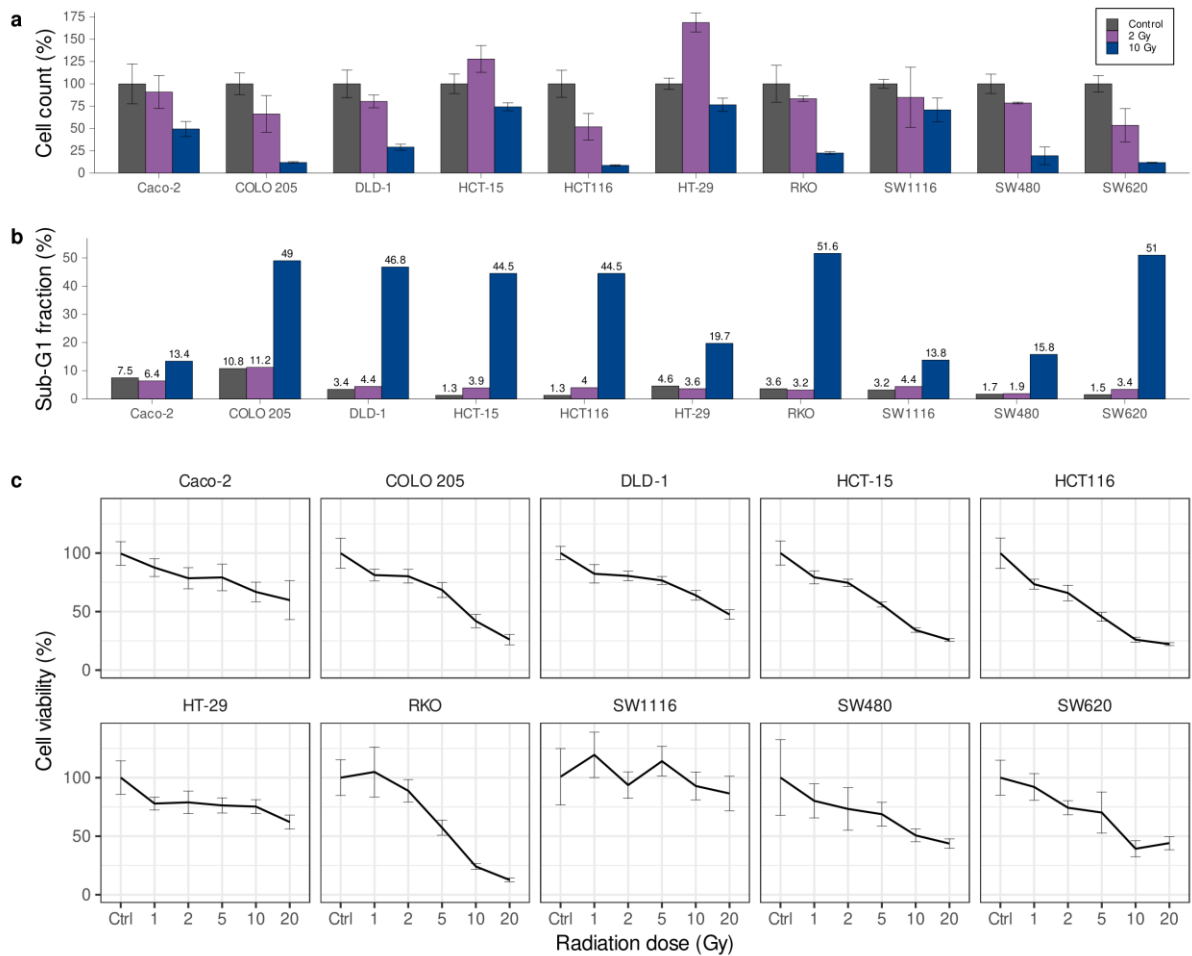

**Supplementary Figure S4.** Viability of CRC cell lines following irradiation. **(a)** Cell viability was assessed through cell counting. **(b)** Flow cytometry analysis determined the percentage of cells in sub-G1 fractions, indicating apoptotic cells after irradiation. **(c)** Cell viability was also evaluated using XTT assays. Error bars represent standard deviations.

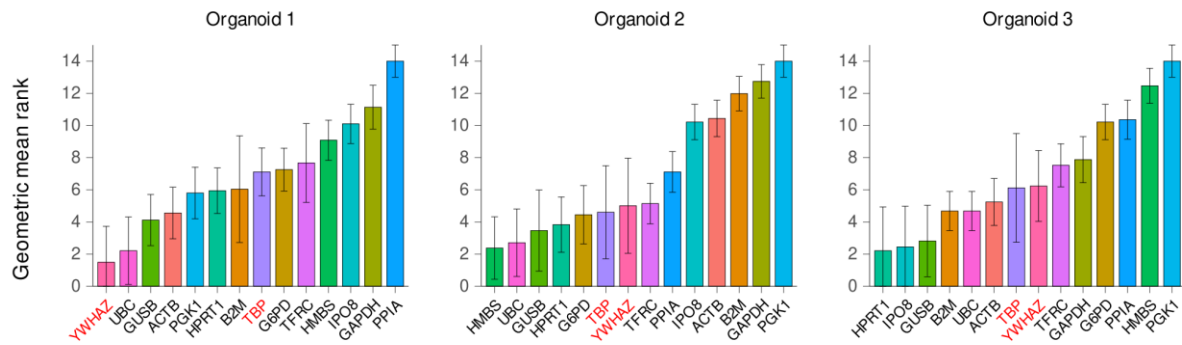

**Supplementary Figure S5.** Gene expression stabilities in three CRC patient-derived organoids exposed to 21 Gy radiation. Colors represent specific genes, and error bars represent standard deviations.

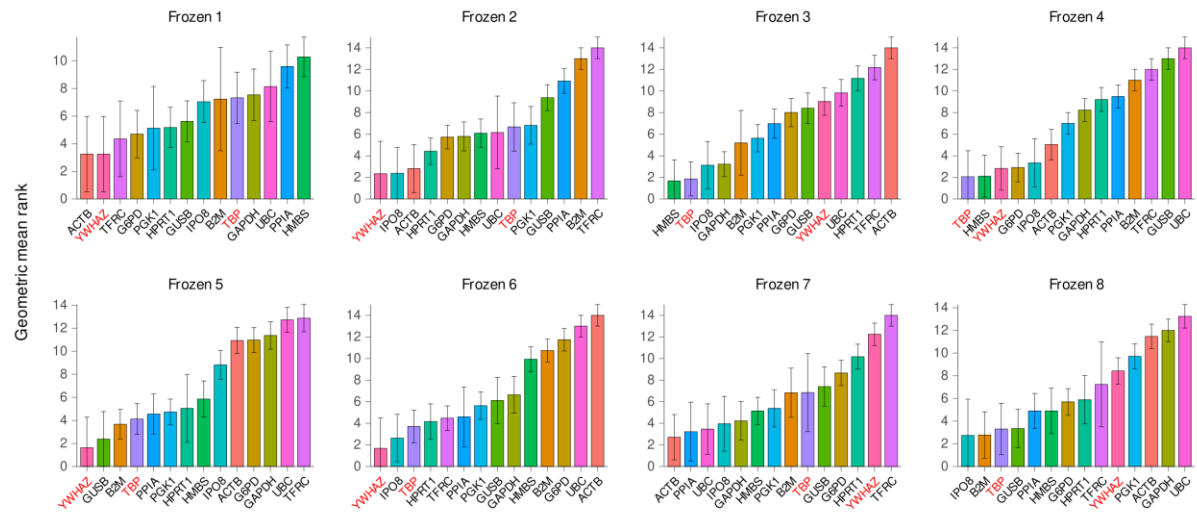

**Supplementary Figure S6.** Gene expression stabilities before and after radiotherapy in eight CRC patient-derived fresh frozen tissues. Colors represent specific genes, and error bars represent standard deviations.

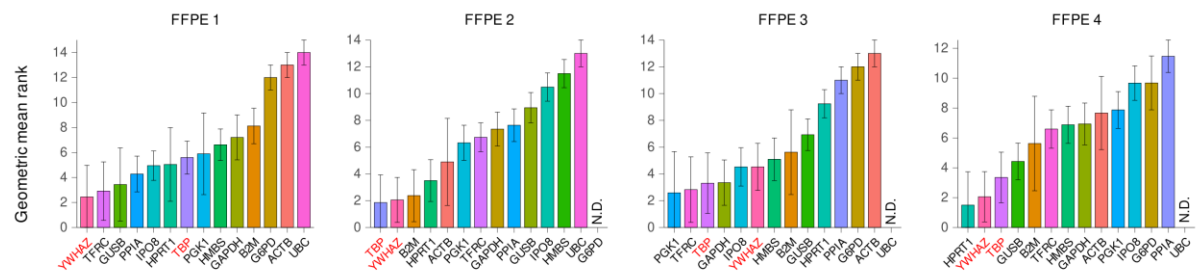

**Supplementary Figure S7.** Gene expression stabilities before and after radiotherapy in four CRC patient-derived formalin-fixed, paraffin-embedded samples. Colors represent specific genes, and error bars represent standard deviations. N.D., not detected.

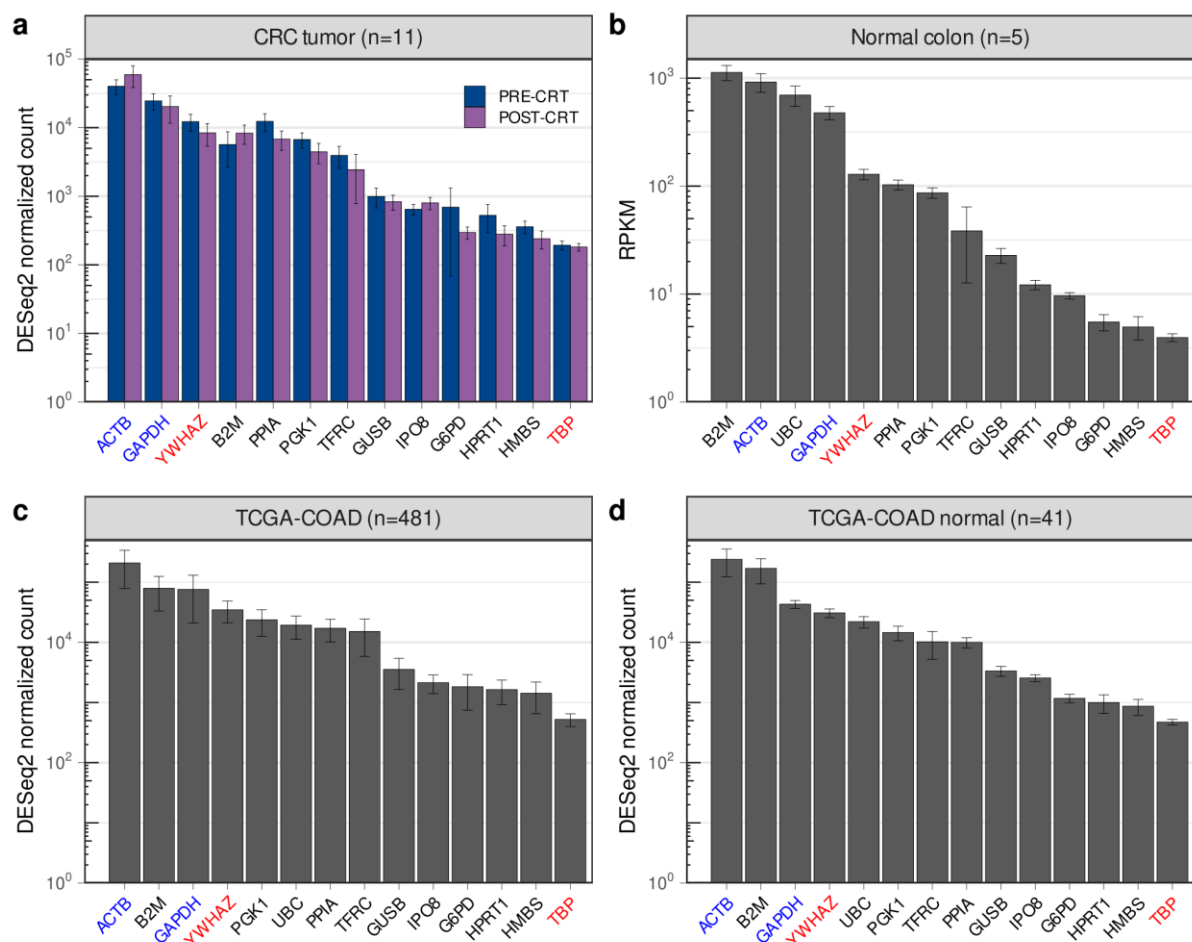

**Supplementary Figure S8.** Expressions of HKGs in tumor and normal tissues determined by RNA sequencing. **(a)** Gene expression analysis using RNA sequencing data (GSE233517). PRE-CRT and POST-CRT represent samples obtained before and after CRT, respectively. **(b)** Gene expression analysis in normal colon tissues obtained from Human Protein Atlas. Gene expression analysis of HKGs in both **(c)** tumor tissues and **(d)** adjacent normal tissues from the TCGA-COAD dataset. The number of cases is indicated by 'n'. The error bars represent standard deviations. RPKM, reads per kilobase of transcript per million mapped reads.



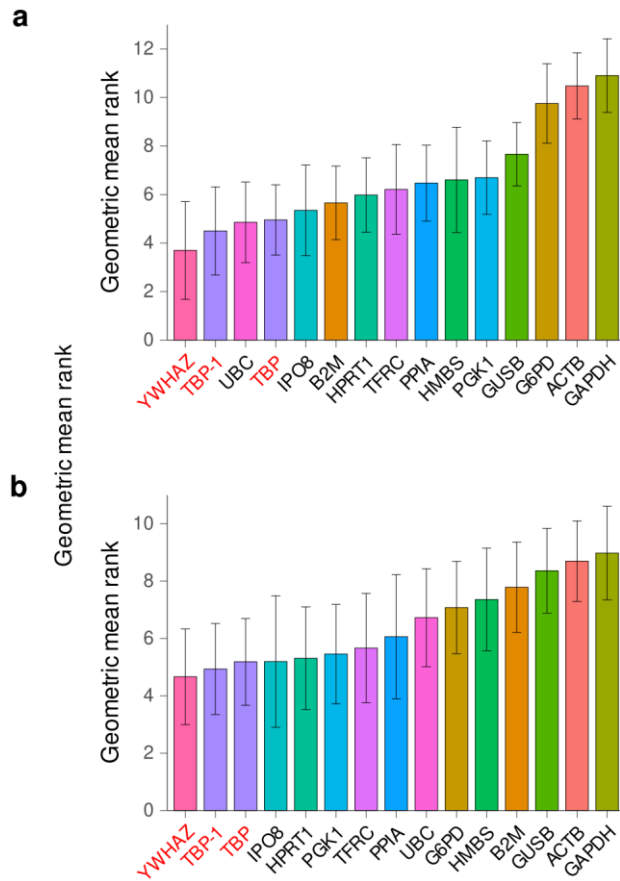

**Supplementary Figure S9.** Gene expression stability of the TBP-1 isoform in irradiated CRC lines. **(a)** and **(b)** show combined results for the ten CRC cell lines after exposure to 2-Gy or 10-Gy radiation, respectively. Error bars represent standard deviations.

**Supplementary Table S1.** Studies included in the analysis

| No | Article title                                                                                                                                                                                         | Radiation dose (Gy) | PCR time after exposure (hr) | Reference gene               | Method | Cell type used                                        | Notes                                                                                                                                                     |
|----|-------------------------------------------------------------------------------------------------------------------------------------------------------------------------------------------------------|---------------------|------------------------------|------------------------------|--------|-------------------------------------------------------|-----------------------------------------------------------------------------------------------------------------------------------------------------------|
| 1  | A novel nanoparticle-based theranostic agent targeting LRP-1 enhances the efficacy of neoadjuvant radiotherapy in colorectal cancer                                                                   | 2                   | 24                           | Not specified                | qPCR   | Xenograft (patient-derived)                           | This article does not describe which gene was used as the reference gene.                                                                                 |
| 2  | Antiproliferative and pro-apoptotic effects of <i>Cyclocarya paliurus</i> polysaccharide and X-ray irradiation combination on SW480 colorectal cancer cells                                           | 8                   | 48                           | <i>GAPDH</i>                 | qPCR   | SW480                                                 |                                                                                                                                                           |
| 3  | CDC25A, VAV1, TP73, BRCA1 and ZAP70 gene overexpression correlates with radiation response in colorectal cancer                                                                                       | 16                  | 12,24,48,72                  | <i>ACTB</i>                  | qPCR   | SW620                                                 | An <i>Oryza sativa</i> sequence was used as a negative control.                                                                                           |
| 4  | Chemotherapy and radiotherapy downregulate the activity and expression of DNA methyltransferase and enhance Bcl-2/E1B-19-kDa interacting protein-3-induced apoptosis in human colorectal cancer cells | 2, 4                | 48                           | <i>ACTB</i>                  | RT-PCR | SW480                                                 |                                                                                                                                                           |
| 5  | Epigallocatechin-3-gallate enhances radiation sensitivity in colorectal cancer cells through Nrf2 activation and autophagy                                                                            | 2                   | 48                           | <i>GAPDH</i>                 | qPCR   | HCT116                                                |                                                                                                                                                           |
| 6  | Epsilon-Globin HBE1 enhances radiotherapy resistance by down-regulating BCL11A in colorectal cancer cells                                                                                             | 5*24d               | Not specified                | <i>ACTB</i>                  | qPCR   | HT-29, RKO, SW480, SW620                              | RT-PCR and qPCR used different reference genes.                                                                                                           |
|    | Epsilon-Globin HBE1 enhances radiotherapy resistance by down-regulating BCL11A in colorectal cancer cells                                                                                             | 5*24d               | Not specified                | <i>GAPDH</i>                 | RT-PCR | Caco-2, DLD-1, HCT116, HT-29, KM12C, RKO, SW480,SW620 |                                                                                                                                                           |
| 7  | Fibroblast growth factor receptor 4 induced resistance to radiation therapy in colorectal cancer                                                                                                      | 2, 4, 6             | 24                           | <i>GAPDH</i>                 | qPCR   | HT-29                                                 |                                                                                                                                                           |
| 8  | Gefitinib enhances the effects of combined radiotherapy and 5-fluorouracil in a colorectal cancer cell line                                                                                           | 2*1d, 2*2d, 2*3d    | 24,48,72                     | <i>ACTB, HPRT1</i>           | qPCR   | LOVO                                                  | RT was given in combination with chemotherapy. The A549 lung cancer cell line was used as a calibrator. This article does not show PCR experiment result. |
| 9  | Interferon-Induced IDO1 mediates radiation resistance and is a therapeutic target in colorectal cancer                                                                                                | 6                   | 48                           | <i>ACTB, GAPDH</i>           | qPCR   | DLD-1, HCT116, HT-29, xenograft(HCT116)               |                                                                                                                                                           |
| 10 | Intricate macrophage-colorectal cancer cell communication in response to radiation                                                                                                                    | 2*5d                | 6                            | <i>ACTB</i>                  | qPCR   | RKO, SW1463                                           |                                                                                                                                                           |
| 11 | LincRNA-p21 enhances the sensitivity of radiotherapy for Human colorectal cancer by targeting the Wnt/ $\beta$ -catenin signaling pathway                                                             | 4                   | Not specified                | <i>GAPDH</i>                 | qPCR   | LOVO, SW1116                                          |                                                                                                                                                           |
| 12 | Microenvironment and dose-delivery-dependent response after exposure to ionizing radiation in human colorectal cancer cell lines                                                                      | 2, 10, 2*5d         | 4                            | <i>HPRT1</i>                 | qPCR   | DLD-1, HT-29                                          |                                                                                                                                                           |
| 13 | MicroRNA-451a regulates colorectal cancer proliferation in response to radiation                                                                                                                      | 2, 5, 10            | 24                           | <i>ACTB, GAPDH</i>           | qPCR   | HCT116                                                |                                                                                                                                                           |
| 14 | Modulating survivin as a radioresistant factor, caspase-3, and apoptosis by omega-3 docosahexaenoic acid sensitizes mutant-p53 colorectal cancer cells to $\gamma$ -irradiation                       | 2, 10               | 48                           | <i>GAPDH</i>                 | RT-PCR | HT-29                                                 |                                                                                                                                                           |
| 15 | MTERFD1 promotes cell growth and irradiation resistance in colorectal cancer by upregulating interleukin-6 and interleukin-11                                                                         | 2, 4, 8             | 4,8,24,48                    | <i>GAPDH</i>                 | qPCR   | HT-29, SW1116                                         |                                                                                                                                                           |
| 16 | Radiation promotes colorectal cancer initiation and progression by inducing senescence-associated inflammatory responses                                                                              | 2                   | 100d                         | <i>UBC, TBP, GUSB, GAPDH</i> | qPCR   | Tissue (CDX2 APC flox/+ (CPC:Apc) mice)               | Gene expression levels were normalized to the geometric mean of UBC, TBP, GUSB, and GAPDH                                                                 |
| 17 | Radiation-induced DNA damage response and resistance in colorectal cancer stem-like cells                                                                                                             | 2, 4, 8             | 24,48                        | <i>ACTB</i>                  | qPCR   | HCT116, HCT-15                                        |                                                                                                                                                           |
| 18 | RBBP6 increases radioresistance and serves as a therapeutic target for preoperative radiotherapy in colorectal cancer                                                                                 | 10                  | 12,24,36                     | <i>GAPDH</i>                 | qPCR   | HT-29, SW620                                          |                                                                                                                                                           |
| 19 | Resistance of colorectal cancer cells to radiation and 5-FU is associated with MELK expression                                                                                                        | 4                   | 24,48,72,96                  | <i>ACTB</i>                  | RT-PCR | SNU-503                                               |                                                                                                                                                           |
| 20 | STING-dependent interferon- $\lambda$ 1 induction in HT29 cells, a human colorectal cancer cell line, after gamma-radiation                                                                           | 2, 3, 6, 12         | 24,72,120                    | <i>ACTB</i>                  | qPCR   | HCT116, HT-29, LOVO                                   |                                                                                                                                                           |
| 21 | Targeting the endoplasmic reticulum mediates radiation sensitivity in colorectal cancer                                                                                                               | 2                   | 24,48,72,96                  | <i>ACTB</i>                  | qPCR   | HT-29                                                 |                                                                                                                                                           |
| 22 | The long noncoding RNA-ROR promotes the resistance of radiotherapy for human colorectal cancer cells by targeting the p53/miR-145 pathway                                                             | Not specified       | Not specified                | <i>GAPDH</i>                 | qPCR   | HCT116                                                |                                                                                                                                                           |

**Supplementary Table S2.** Human colorectal cancer cell lines used in this study

| Cell lines | Morphology <sup>1</sup> | Tissue <sup>1</sup> | Disease <sup>1</sup> | Growth properties <sup>1</sup> | Dukes' Stage <sup>1,2</sup> | Derived from <sup>1</sup> | Age <sup>1</sup> | Ethnicity <sup>1</sup> | Gender <sup>1</sup> | MSI status <sup>2,3</sup> | CIMP <sup>3</sup> | CIN <sup>2</sup> | TP53 <sup>2,3</sup> | KRAS <sup>2,3</sup> | BRAF <sup>2,3</sup> | PIK3CA <sup>3</sup> | PTEN <sup>3</sup> | SF2 <sup>4</sup> | SF2 <sup>5</sup> | SF5 <sup>5</sup> | SF8 <sup>5</sup> |
|------------|-------------------------|---------------------|----------------------|--------------------------------|-----------------------------|---------------------------|------------------|------------------------|---------------------|---------------------------|-------------------|------------------|---------------------|---------------------|---------------------|---------------------|-------------------|------------------|------------------|------------------|------------------|
| Caco-2     | Epithelial-like         | Colon               | Adenoca.             | Adherent                       |                             |                           | 72               | White                  | Male                | MSS                       | +                 | +                | E204X               | wt                  | wt                  | wt                  | wt                |                  |                  |                  |                  |
| COLO 205   | Epithelial-like         | Colon               | Adenoca.             | Mixed; adherent, suspension    | D                           |                           | 70               | White                  | Male                | MSS                       | +                 |                  | Y107fs<br>Y103fs    | wt                  | V600E               | wt                  | wt                | 0.69             | 0.0048           | 0.0011           | 0.0003           |
| DLD-1      | Epithelial              | Colon               | Adenoca.             | Adherent                       | C                           |                           | Adult            |                        | Male                | MSI                       | +                 | -                | S241F               | G13D                | wt                  | E545K<br>D549N      | wt                |                  |                  |                  |                  |
| HCT-15     | Epithelial              | Colon               | Adenoca.             | Adherent                       | C                           |                           |                  |                        | Male                | MSI                       | +                 | -                | S241F               | G13D                | wt                  | E545K<br>D549N      | wt                | 0.4              | 0.659            | 0.338            | 0.2006           |
| HCT116     | Epithelial              | Colon ascendens     | Carcinoma            | Adherent                       | C                           | Primary tumor             | 48               |                        | Male                | MSI                       | +                 | -                | wt                  | G13D                | wt                  | H1047R              | wt                | 0.38             | 0.465            | 0.028            | 0.0019           |
| HT-29      | Epithelial              | Colon               | Adenoca.             | Adherent                       |                             | Primary tumor             | 44               | White                  | Female              | MSS                       | +                 | +                | R273H               | wt                  | V600E<br>T119S      | wt                  | wt                | 0.79             | 0.74             | 0.5              | 0.332            |
| RKO        | Epithelial              | Colon               | Carcinoma            | Adherent                       |                             | Primary tumor             |                  |                        |                     | MSI                       | +                 | -                | wt                  | wt                  | V600E               | H1047R              | wt                |                  |                  |                  |                  |
| SW1116     | Epithelial              | Colon               | Adenoca.             | Adherent                       | A                           |                           | 73               | White                  | Male                | MSS                       | -                 | +                | A159D               | G12A                | wt                  | wt                  | wt                |                  |                  |                  |                  |
| SW480      | Epithelial              | Colon               | Adenoca.             | Adherent                       | B                           | Primary tumor             | 50               | White                  | Male                | MSS                       | -                 | +                | R273H<br>P309S      | G12V                | wt                  | wt                  | wt                |                  |                  |                  |                  |
| SW620      | Epithelial              | Colon               | Adenoca.             | Adherent                       | C                           | Lymph node metastasis     | 51               | White                  | Male                | MSS                       | -                 | +                | R273H<br>P309S      | G12V                | wt                  | wt                  | wt                | 0.62             | 0.58             | 0.0758           | 0.000251         |

MSI, microsatellite instability; CIMP, CpG island methylator phenotype; CIN, chromosomal instability; SF2, surviving fractions of the cells after 2 Gy irradiation; Adenoca., adenocarcinoma; MSS, microsatellite stable; wt, wild type.

[References]

<sup>1</sup>American Type Culture Collection (ATCC): <https://www.atcc.org/>

<sup>2</sup>Ahmed, D. *et al.* Epigenetic and genetic features of 24 colon cancer cell lines. *Oncogenesis* **2**, e71–e71 (2013).

<sup>3</sup>Berg, K. C. G. *et al.* Multi-omics of 34 colorectal cancer cell lines - a resource for biomedical studies. *Molecular Cancer* **16**, 116 (2017).

<sup>4</sup>Torres-Roca, J. F. *et al.* Prediction of radiation sensitivity using a gene expression classifier. *Cancer Res* **65**, 7169–7176 (2005).

<sup>5</sup>Amundson, S. A. *et al.* Integrating global gene expression and radiation survival parameters across the 60 cell lines of the National Cancer Institute Anticancer Drug Screen. *Cancer Res* **68**, 415–424 (2008).

**Supplementary Table S3.** Culture conditions for the colorectal cancer cell lines and source of origin

| Cell lines | Source | KCLB or ATCC catalog number | Passage number at acquisition | Culture media composition                                | Cell seeding count in 6-well plate (cells/well) |
|------------|--------|-----------------------------|-------------------------------|----------------------------------------------------------|-------------------------------------------------|
| Caco-2     | KCLB   | 30037.1                     | 30                            | MEM (25mM HEPES, NaHCO <sub>3</sub> -sodium bicarbonate) | $2 \times 10^5$                                 |
| COLO 205   | KCLB   | 10222                       | 25                            | RPMI 1640 (10%FBS, 2% P/S)                               | $2 \times 10^5$                                 |
| DLD-1      | KCLB   | 10221                       | 44                            | RPMI 1640 (10%FBS, 1% P/S)                               | $1.5 \times 10^5$                               |
| HCT-15     | KCLB   | 10225                       | 45                            | RPMI 1640 (10%FBS, 2% P/S)                               | $1 \times 10^5$                                 |
| HCT116     | KCLB   | 10247                       | 37                            | RPMI 1640 (10%FBS, 1% P/S)                               | $1 \times 10^5$                                 |
| HT-29      | KCLB   | 30038                       | 39                            | RPMI 1640 (10%FBS, 1% P/S)                               | $1 \times 10^5$                                 |
| RKO        | ATCC   | CRL-2577                    | Unknown                       | Eagle's MEM (10%FBS, 1% P/S)                             | $1 \times 10^5$                                 |
| SW1116     | KCLB   | 10233                       | 57                            | RPMI 1640 (10%FBS, 2% P/S)                               | $2 \times 10^5$                                 |
| SW480      | KCLB   | 10228                       | 119                           | RPMI 1640 (10%FBS, 1% P/S)                               | $1.5 \times 10^5$                               |
| SW620      | KCLB   | 60068                       | 8                             | RPMI 1640 (10%FBS, 3% P/S)                               | $1.5 \times 10^5$                               |

KCLB, Korea Cell Line Bank; ATCC, American Type Culture Collection; MEM, minimum essential media; RPMI, Roswell Park Memorial Institute media; FBS, fetal bovine serum; P/S penicillin-streptomycin

**Supplementary Table S4.** Primer sequences used in this study

| HGNC Symbol  | HGNC official full name                                                     | NCBI Gene ID | Primer sequence (forward)   | Primer sequence (reverse)    | Amplicon size (bp) |
|--------------|-----------------------------------------------------------------------------|--------------|-----------------------------|------------------------------|--------------------|
| <i>ACTB</i>  | Actin beta                                                                  | 60           | 5'-ATAGCACAGCCTGGATAGCAA-3' | 5'-AATCTGGCACCACACCTTCTA-3'  | 170                |
| <i>B2M</i>   | Beta-2-microglobulin                                                        | 567          | 5'-TGGGTTTCATCCATCCGACA-3'  | 5'-ACGGCAGGCATACTCATCTT-3'   | 160                |
| <i>G6PD</i>  | Glucose-6-phosphate dehydrogenase                                           | 2539         | 5'-CAACCACATCTCCTCCCTGT-3'  | 5'-ATGTTGTCCCGTTCCAGAT-3'    | 138                |
| <i>GAPDH</i> | Glyceraldehyde-3-phosphate dehydrogenase                                    | 2597         | 5'-AAATGAGCCCCAGCCTTCTC-3'  | 5'-GTCAAGGCTGAGAACGGGAA-3'   | 158                |
| <i>GUSB</i>  | Glucuronidase beta                                                          | 2990         | 5'-CCCACTCAGTAGCCAAGTCA-3'  | 5'-CACAAAACCCAGGCCAGAAA-3'   | 172                |
| <i>HMBS</i>  | Hydroxymethylbilane synthase                                                | 3145         | 5'-AAGACCCTAGAAACCCTGCC-3'  | 5'-TCCAGATGCGGGAACCTTCT-3'   | 92                 |
| <i>HPRT1</i> | Hypoxanthine phosphoribosyltransferase 1                                    | 3251         | 5'-ACTGAACGTCTTGCTCGAGA-3'  | 5'-GCTACAATGTGATGGCCTCC-3'   | 56                 |
| <i>IPO8</i>  | Importin 8                                                                  | 10526        | 5'-TGAACAACAGGGAGGCTTCA-3'  | 5'-TTCATCCCCTTGACCCTCAC-3'   | 159                |
| <i>PGKI</i>  | Phosphoglycerate kinase 1                                                   | 5230         | 5'-GGACAGGACCACAGAGCTAG-3'  | 5'-GGAGGCACATTGGAAAAGCA-3'   | 90                 |
| <i>PPIA</i>  | Peptidylprolyl isomerase A                                                  | 5478         | 5'-GGAGGCTTTGAGGTTTTGCA-3'  | 5'-TTAAGGTGGGCAGAGAAGGG-3'   | 171                |
| <i>TBP</i>   | TATA-box binding protein                                                    | 6908         | 5'-AGTTCTGGGATTGTACCGCA-3'  | 5'-TGTGCACACCATTTTCCCAG-3'   | 195                |
| <i>TFRC</i>  | Transferrin receptor                                                        | 7037         | 5'-AGATTCTGGTTCGGGTGTT-3'   | 5'-TGAAGAGACTCACTGCTGCA-3'   | 113                |
| <i>UBC</i>   | Ubiquitin C                                                                 | 7316         | 5'-TGGGTCGCAGTTCTTGTTG-3'   | 5'-ACGAAGATCTGCATTGTCAAGT-3' | 60                 |
| <i>YWHAZ</i> | Tyrosine 3-monooxygenase/tryptophan 5-monooxygenase activation protein zeta | 7534         | 5'-CGCCAGAACATCCAGTCATG-3'  | 5'-ATCATATCGCTCAGCCTGCT-3'   | 77                 |

Primer sequences of the 14 housekeeping genes examined. HGNC, Human Genome Organization (HUGO) Gene Nomenclature Committee

**Supplementary Table S5.** Clinicopathological parameters of patients and experimental conditions for the organoids

| Samples    | Sex  | Age | BMI   | cT stage | cN stage | ypT stage | ypN stage | Histological differentiation | Tumor budding | Perineural invasion | KRAS   | BRAF | MSI | Organoid RT | Viability after RT (% control) | 260/280 OD ratio |
|------------|------|-----|-------|----------|----------|-----------|-----------|------------------------------|---------------|---------------------|--------|------|-----|-------------|--------------------------------|------------------|
| Organoid 1 | Male | 64  | 24.31 | T3       | N2       | T3        | N2b       | Moderately                   | Present       | Present             | Mutant | Wild | MSS | Control     |                                | 1.87             |
| Organoid 1 |      |     |       |          |          |           |           |                              |               |                     |        |      |     | 21 Gy       | 38.1                           | 1.8              |
| Organoid 2 | Male | 42  | 20.7  | T4a      | N2       | NA        | NA        | NA                           | NA            | NA                  | NA     | NA   | MSS | Control     |                                | 1.89             |
| Organoid 2 |      |     |       |          |          |           |           |                              |               |                     |        |      |     | 21 Gy       | 13.9                           | 1.85             |
| Organoid 3 | Male | 64  | 20.35 | T3       | N1       | T3        | N1a       | Moderately                   | Absent        | Absent              | NA     | NA   | MSS | Control     |                                | 1.86             |
| Organoid 3 |      |     |       |          |          |           |           |                              |               |                     |        |      |     | 21 Gy       | 49.9                           | 1.83             |

The 260/280 OD ratio was used to assess the purity of DNA and RNA. RT, radiotherapy; OD, optical density; MSS, microsatellite stable; NA, Not available.

**Supplementary Table S6.** Clinicopathological parameters of patients and quality of RNA extracted for the fresh frozen tissues

| Samples  | Condition | Sex | Age | BMI   | cT stage | cN stage | ypT stage | ypN stage | Histological differentiation | Tumor budding | Perineural invasion | KRAS   | BRAF | OP  | CTx | Regimen  | RT  | Dose    | TRG | MSI | DV200 |
|----------|-----------|-----|-----|-------|----------|----------|-----------|-----------|------------------------------|---------------|---------------------|--------|------|-----|-----|----------|-----|---------|-----|-----|-------|
| Frozen 1 | Pre-RT    | M   | 66  | 23.47 | T4b      | N2b      | T3        | N0        | Moderately                   | Absent        | Absent              | NA     | NA   |     | Yes | 5-FU     | Yes | 50.4 Gy |     | NA  | 93.41 |
| Frozen 1 | Post-RT   |     |     |       |          |          |           |           |                              |               |                     | Mutant | Wild | LAR | Yes | FOLFOX-4 |     |         | 2   | MSS | 90.3  |
| Frozen 2 | Pre-RT    | M   | 67  | 23.79 | T2       | N1       | T2        | N0        | Moderately                   | Present       | Absent              | NA     | NA   |     | Yes | Xeloda   | Yes | 50.4 Gy |     | MSS | 96.99 |
| Frozen 2 | Post-RT   |     |     |       |          |          |           |           |                              |               |                     | Wild   | Wild | LAR | Yes | FOLFOX-4 |     |         | 3   | MSS | 92.54 |
| Frozen 3 | Pre-RT    | M   | 55  | 20.89 | T3       | N2b      | T3        | N0        | Moderately                   | Absent        | Present             | NA     | NA   |     | Yes | Xeloda   | Yes | 50.4 Gy |     | MSS | 86.45 |
| Frozen 3 | Post-RT   |     |     |       |          |          |           |           |                              |               |                     | Mutant | Wild | LAR | Yes | FOLFOX-6 |     |         | 3   | MSS | 88.34 |
| Frozen 4 | Pre-RT    | M   | 63  | 15.31 | T4a      | N2b      | T3        | N0        | Moderately                   | Absent        | Present             | NA     | NA   |     | Yes | 5-FU     | Yes | 50.4 Gy |     | MSS | 97.93 |
| Frozen 4 | Post-RT   |     |     |       |          |          |           |           |                              |               |                     | Mutant | Wild | LAR | Yes | FOLFOX-4 |     |         | 3   | MSS | 94.47 |
| Frozen 5 | Pre-RT    | M   | 64  | 23.53 | T4a      | N1b      | T3        | N0        | Moderately                   | Absent        | Absent              | NA     | NA   |     | Yes | Xeloda   | Yes | 50.4 Gy |     | MSS | 95.07 |
| Frozen 5 | Post-RT   |     |     |       |          |          |           |           |                              |               |                     | Wild   | Wild | LAR | Yes | FOLFOX-4 |     |         | 3   | MSS | 90.1  |
| Frozen 6 | Pre-RT    | F   | 54  | 19.56 | T4       | N2       | T3        | N2a       | Moderately                   | Absent        | Present             | NA     | NA   |     | Yes | 5-FU     | Yes | 50.4 Gy |     | MSS | 77.94 |
| Frozen 6 | Post-RT   |     |     |       |          |          |           |           |                              |               |                     | Wild   | Wild | LAR | Yes | FOLFOX-4 |     |         | 3   | MSS | 84.86 |
| Frozen 7 | Pre-RT    | M   | 71  | 19.33 | T3       | N1a      | T4a       | N0        | Moderately                   | Absent        | Absent              | Wild   | NA   |     | Yes | 5-FU     | Yes | 50.4 Gy |     | NA  | 84.1  |
| Frozen 7 | Post-RT   |     |     |       |          |          |           |           |                              |               |                     | Wild   | Wild | LAR | No  |          |     |         | 4   | MSS | 81.54 |
| Frozen 8 | Pre-RT    | M   | 71  | 16.86 | T4a      | N2b      | T4a       | N1b       | Poorly                       | Present       | Present             | NA     | NA   |     | Yes | 5-FU     | Yes | 54 Gy   |     | MSS | 96.92 |
| Frozen 8 | Post-RT   |     |     |       |          |          |           |           |                              |               |                     | Wild   | Wild | LAR | Yes | FOLFOX-4 |     |         | 4   | MSS | 92.07 |

DV200 is the percentage of RNA fragments > 200 nts. BMI, body mass index; OP, operative procedure; CTx, chemotherapy; RT, radiotherapy; TRG, tumor regression grade; MSI, microsatellite instability; NA, not available; LAR, Low anterior resection; 5-FU, 5-Fluorouracil; FOLFOX, Folinic acid, fluorouracil and oxaliplatin; MSS, microsatellite stable.

**Supplementary Table S7.** Clinicopathological parameters of patients and quality of RNA extracted for the formalin-fixed, paraffin-embedded samples

| Samples | Condition | Sex | Age | BMI   | cT stage | cN stage | ypT stage | ypN stage | Histological differentiation | Tumor budding | Perineural invasion | KRAS   | BRAF | OP  | CTx | Regimen  | RT  | Dose    | TRG | MSI   | DV200 |
|---------|-----------|-----|-----|-------|----------|----------|-----------|-----------|------------------------------|---------------|---------------------|--------|------|-----|-----|----------|-----|---------|-----|-------|-------|
| FFPE 1  | Pre-RT    | F   | 78  | 19.1  | T3       | NA       | T2        | N0        | Moderately                   | Present       | Absent              | NA     | NA   | LAR | No  |          | No  |         |     | NA    | 79.93 |
| FFPE 1  | Post-RT   |     |     |       |          |          |           |           |                              |               |                     | Mutant | Wild |     | No  |          | No  |         | NA  | MSI-H | 69.97 |
| FFPE 2  | Pre-RT    | M   | 71  | 19.63 | T4b      | N1b      | T3        | N1b       | Moderately                   | Absent        | Present             | NA     | NA   | LAR | Yes | 5-FU     | Yes | 50.4 Gy |     | NA    | 51.41 |
| FFPE 2  | Post-RT   |     |     |       |          |          |           |           |                              |               |                     | Mutant | Wild |     | Yes | FOLFOX-4 | No  |         | 4   | MSS   | 59.18 |
| FFPE 3  | Pre-RT    | F   | 81  | 23.23 | T3       | N2b      | T3        | N2a       | Moderately                   | Absent        | Present             | NA     | NA   | AR  | No  |          | Yes | 50.4 Gy |     | MSS   | 59.35 |
| FFPE 3  | Post-RT   |     |     |       |          |          |           |           |                              |               |                     | Wild   | Wild |     | No  |          | No  |         | 5   | MSS   | 38.87 |
| FFPE 4  | Pre-RT    | M   | 79  | 20.7  | T4       | N2       | T4a       | N2a       | Moderately                   | Absent        | Present             | NA     | NA   | LAR | Yes | 5-FU     | Yes | 50.4 Gy |     | NA    | 61.49 |
| FFPE 4  | Post-RT   |     |     |       |          |          |           |           |                              |               |                     | Wild   | Wild |     | Yes | 5-FU     | No  |         | 3   | MSS   | 67.82 |

DV200 is the percentage of RNA fragments > 200 nts. BMI, body mass index; OP, operative procedure; CTx, chemotherapy; RT, radiotherapy; TRG, tumor regression

grade; MSI, microsatellite instability; NA, not available; LAR, Low anterior resection; MSI-H, microsatellite instability-high; 5-FU, 5-Fluorouracil; FOLFOX, Folinic acid, fluorouracil and oxaliplatin; MSS, microsatellite stable; AR, Abdominoperineal resection.



**Supplementary Table S8.** TBP-1 isoform primer sequences

| HGNC symbol | HGNC official name       | NCBI gene ID | Primer sequence (forward)  | Primer sequence (reverse)  | Amplicon size (bp) |
|-------------|--------------------------|--------------|----------------------------|----------------------------|--------------------|
| TBP-1       | TATA-box binding protein | 6908         | 5'-CACTGTTTCTTGGCGTGTGA-3' | 5'-AGCATCTCCAGCACACTCTT-3' | 72                 |

HGNC, Human Genome Organization (HUGO) Gene Nomenclature Committee
